# Supplementary material for: A Rare Case of Digital Ischemia and Gangrene in ANCA-Associated Vasculitis with Review of the Literature
Source: Hindawi journal article supplement (doi:10.1155/2017/2421760), 2017-01-01

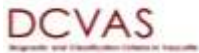

New ACR-EULAR classification criteria for ANCA-associated vasculitis

Lead Investigators

Raashid Luqmani, University of Oxford  
Peter A. Merkel, University of Pennsylvania  
Richard Watts, University of East Anglia

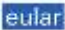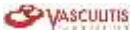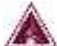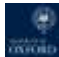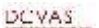

Disclosures

- Ravi Suppiah – None
- Peter Grayson – None
- Cristina Ponte – None
- Jo Robson – None
- Richard Watts – None
- Peter Merkel – None
- Raashid Luqmani – None

Evidence based

Prior Classification/Nomenclature Schemes in Vasculitis

1. Leavitt RY et al. The American College of Rheumatology 1990 criteria for the classification of Wegener's granulomatosis. *Arthritis Rheum* 1990.
2. Masi AT et al. The American College of Rheumatology 1990 criteria for the classification of Churg-Strauss syndrome (allergic granulomatosis and angiitis). *Arthritis Rheum* 1990.
3. Lightfoot RW et al. The American College of Rheumatology 1990 criteria for the classification of polyarteritis nodosa. *Arthritis Rheum* 1990.
4. Jennette JC et al. Nomenclature of systemic vasculitides. Proposal of an international consensus conference. *Arthritis Rheum* 1994
5. Jennette JC et al. 2012 Revised International Chapel Hill Consensus Conference Nomenclature of Vasculitides. *Arthritis Rheum* 2013.

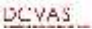

Acknowledgements

DCVAS is *sponsored* by the University of Oxford and supported in the UK by the NIHR Clinical Research Network

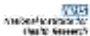

DCVAS is *funded* by the American College of Rheumatology, the European League Against Rheumatism and the Vasculitis Foundation

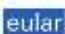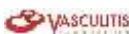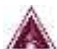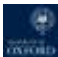

Introduction to the ACR-EULAR classification criteria for ANCA-associated vasculitis symposium

- Why and how?  
Ravi Suppiah, Peter Grayson, Cristina Ponte
- Results of 2017 Provisional classification criteria for Granulomatosis with Polyangiitis (GPA)  
Joanna Robson
- Implications for Clinical Practice / Q&A  
Raashid Luqmani, Peter Merkel, Richard Watts

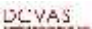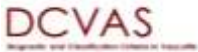

New ACR-EULAR classification criteria for ANCA-associated vasculitis: *why and how?*

Presenters

Ravi Suppiah, Auckland District Health Board  
Peter Grayson, United States National Institutes of Health  
Cristina Ponte, Lisbon Academic Medical Centre

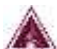

Overview of this section

1. Why do we need new criteria?

2. How did we develop new criteria?

1. Why?

Example case 1

- 45 year-old female
- Unwell for 2 weeks
- Fevers to 38°C (100°F)
- Weight loss of 4kg (8.8lb)
- Left foot and right wrist drop

DCVAS

DCVAS

1. Why?

Example case 1

- 45 year-old female
- Unwell for 2 weeks
- Fevers to 38°C (100°F)
- Weight loss of 4kg (8.8lb)
- Left foot and right wrist drop
- Scleritis

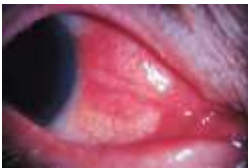

DCVAS

1. Why?

Example case 1

- 45 year-old female
- Unwell for 2 weeks
- Fevers to 38°C (100°F)
- Weight loss of 4kg (8.8lb)
- Left foot and right wrist drop
- Scleritis
- Progressive breathlessness for 4 months

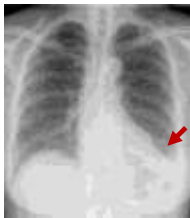

Blunting of costophrenic angle + opacification

DCVAS

1. Why?

Example case 1

- 45 year-old female
- Unwell for 2 weeks
- Fevers to 38°C (100°F)
- Weight loss of 4kg (8.8lb)
- Left foot and right wrist drop
- Scleritis
- Progressive breathlessness for 4 months

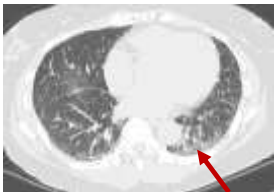

HRCT Chest      Fibrotic NSIP

DCVAS

1. Why?

Example case 1 - Investigations

- Hb 101 g/L (10.1g/dL)
- Eosinophil count normal
- CRP 180 mg/L
- Creatinine 360 umol/L (3.5 mg/dL)

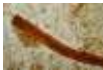

Red cell casts in urine

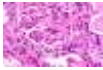

Pauci immune crescentic GN on renal biopsy

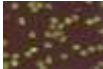

pANCA positive on IF  
MPO-ANCA positive by ELISA

DCVAS

1. Why?

Example case 1 - How would you classify this case?

- A. Polyarteritis nodosa (PAN)
- B. Eosinophilic granulomatosis with polyangiitis (EGPA)
- C. Granulomatosis with polyangiitis (GPA)
- D. Microscopic polyangiitis (MPA)
- E. Other type of vasculitis

DCVAS

1. Why?

Example case 1 - How would you classify this case?

- A. Polyarteritis nodosa (PAN)
- B. Eosinophilic granulomatosis with polyangiitis (EGPA)
- C. Granulomatosis with polyangiitis (GPA)
- D. Microscopic polyangiitis (MPA)
- E. Other type of vasculitis

DCVAS

1. Why?

Example case 1 - How would you classify this case?

No microscopic polyangiitis (MPA)  
in the 1990 ACR classification criteria

DCVAS

1. Why?

Example case 1 - 1990 ACR Classification – GPA  
(Wegener's)

- 1. Nasal or oral inflammation
- 2. Abnormal chest radiograph
- 3. Urinary sediment
- 4. Granulomatous inflammation on biopsy

Requires 2 of  
the 4 criteria to  
be classified as  
GPA

Leavitt RY et al. Arthritis Rheum 1990

DCVAS

1. Why?

Example case 1 - 1990 ACR Classification – GPA  
(Wegener's)

- 1. Nasal or oral inflammation
- 2. Abnormal chest radiograph
- 3. Urinary sediment
- 4. Granulomatous inflammation on biopsy

Requires 2 of  
the 4 criteria to  
be classified as  
GPA

Patient meets criteria for GPA

Leavitt RY et al. Arthritis Rheum 1990

DCVAS

1. Why?

Example case 1 - 1990 ACR Classification - PAN

- 1. Weight loss ≥4 kg
- 2. Livedo reticularis
- 3. Testicular pain or tenderness
- 4. Myalgias, weakness, or leg tenderness
- 5. Mononeuropathy or polyneuropathy
- 6. Diastolic BP >90 mmHg
- 7. Elevated BUN or creatinine
- 8. Hepatitis B virus
- 9. Arteriographic abnormality
- 10. Biopsy of small or medium sized artery containing PMN

Requires 3 of  
the 10 criteria  
to be classified  
as PAN

Lightfoot RW et al. Arthritis Rheum 1990

DCVAS

1. Why?

Example case 1 - 1990 ACR Classification - PAN

- 1. Weight loss  $\geq 4$  kg
- 2. Livedo reticularis
- 3. Testicular pain or tenderness
- 4. Myalgias, weakness, or leg tenderness
- 5. Mononeuropathy or polyneuropathy
- 6. Diastolic BP  $>90$  mmHg
- 7. Elevated BUN or creatinine
- 8. Hepatitis B virus
- 9. Arteriographic abnormality
- 10. Biopsy of small or medium sized artery containing PMN

Requires 3 of the 10 criteria to be classified as PAN

Patient meets criteria for PAN

Lightfoot RW et al. Arthritis Rheum 1990

DCVAS

1. Why?

Example case 2

- 73 year old female
- Unwell for 2 months
- Fevers to  $38^{\circ}\text{C}$  ( $100^{\circ}\text{F}$ )
- Night sweats
- Weight loss of 3kg (6.6lb)
- Myalgia and arthralgia
- Cough

DCVAS

1. Why?

Example case 2

- 73 year old female
- Unwell for 2 months
- Fevers to  $38^{\circ}\text{C}$  ( $100^{\circ}\text{F}$ )
- Night sweats
- Weight loss of 3kg (6.6lb)
- Myalgia and arthralgia
- Cough

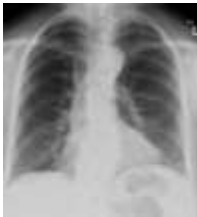

Normal CXR

DCVAS

1. Why?

Example case 2

- 73 year old female
- Unwell for 2 months
- Fevers to  $38^{\circ}\text{C}$  ( $100^{\circ}\text{F}$ )
- Night sweats
- Weight loss of 3kg (6.6lb)
- Myalgia and arthralgia
- Cough

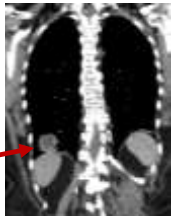

CT Chest—same day as CXR

DCVAS

1. Why?

Example case 2

- 73 year old female
- Unwell for 2 months
- Fevers to  $38^{\circ}\text{C}$  ( $100^{\circ}\text{F}$ )
- Night sweats
- Weight loss of 3kg (6.6lb)
- Myalgia and arthralgia
- Cough

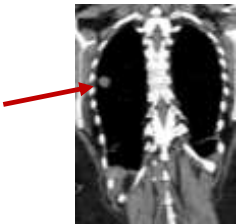

CT Chest—same day as CXR

DCVAS

1. Why?

Example case 2

- 73 year old female
- Unwell for 2 months
- Fevers to  $38^{\circ}\text{C}$  ( $100^{\circ}\text{F}$ )
- Night sweats
- Weight loss of 3kg (6.6lb)
- Myalgia and arthralgia
- Cough

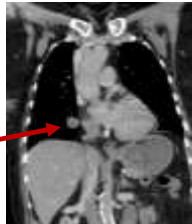

CT Chest—same day as CXR

DCVAS

1. Why?

Example case 2

- Sensation of blocked left ear with reduced hearing
- CRP 82 mg/L
- Urine normal
- Blood cultures negative
- Eosinophil count normal

DCVAS

1. Why?

Example case 2

- Sensation of blocked left ear with reduced hearing
- CRP 82 mg/L
- Urine normal
- Blood cultures negative
- Eosinophil count normal

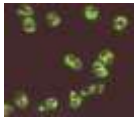

cANCA positive on IF  
PR3-ANCA strongly positive on ELISA

DCVAS

1. Why?

Example case 2

- Sensation of blocked left ear with reduced hearing
- CRP 82 mg/L
- Urine normal
- Blood cultures negative
- Eosinophil count normal

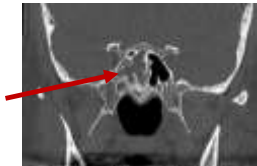

Opacified right sphenoid sinus

DCVAS

1. Why?

Example case 2 - How would you classify this case?

- A. Polyarteritis nodosa (PAN)
- B. Eosinophilic granulomatosis with polyangiitis (EGPA)
- C. Granulomatosis with polyangiitis (GPA)
- D. Microscopic polyangiitis (MPA)
- E. Other type of vasculitis

DCVAS

1. Why?

Example case 2 - How would you classify this case?

- A. Polyarteritis nodosa (PAN)
- B. Eosinophilic granulomatosis with polyangiitis (EGPA)
- C. Granulomatosis with polyangiitis (GPA)
- D. Microscopic polyangiitis (MPA)
- E. Other type of vasculitis

DCVAS

1. Why?

Example case 2 - 1990 ACR Classification – GPA (Wegener's)

- 1. Nasal or oral inflammation
- 2. Abnormal chest radiograph
- 3. Urinary sediment
- 4. Granulomatous inflammation on biopsy

Requires 2 of the 4 criteria to be classified as GPA

Leavitt RY et al. Arthritis Rheum 1990

DCVAS

## 1. Why?

### Example case 2 - 1990 ACR Classification – GPA (Wegener's)

1. Nasal or oral inflammation
2. Abnormal chest radiograph
3. Urinary sediment
4. Granulomatous inflammation on biopsy

**Requires 2 of the 4 criteria to be classified as GPA**

Patient does **NOT** meet criteria for GPA

Leavitt RY et al. *Arthritis Rheum* 1990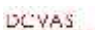

## 1. Why?

## Why do we need new criteria?

- Old criteria not consistent with current disease definitions
- No MPA
- ANCA
- Improved imaging

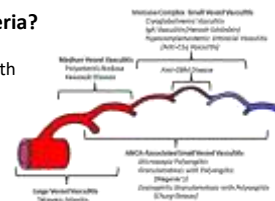

2012 Chapel Hill Consensus Conference

Jennette JC et al. *Arthritis Rheum* 2013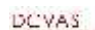

## 1. Why?

### Why do we need new criteria?

- Old criteria not consistent with current disease definitions
- No MPA
- ANCA
- Improved imaging

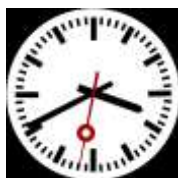

## TIME FOR AN UPDATE

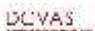

## 2. How?

## Background to the methodology

### Classification vs Diagnostic Criteria

- Classification criteria enable stratification of homogenous groups to standardize recruitment into clinical trials and related studies
- Distinguish amongst different types of vasculitis
  - No inclusion of vasculitis mimics as comparators

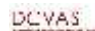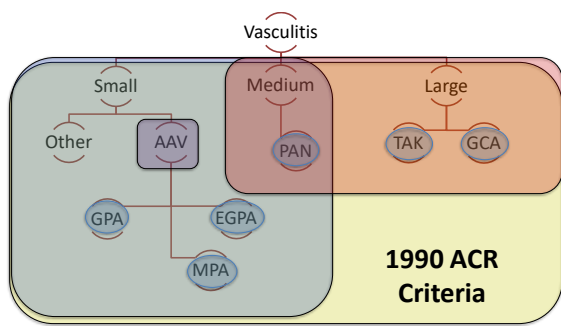

**133 sites in 33 countries**

|             |      |             |             |
|-------------|------|-------------|-------------|
| <b>1001</b> | 1001 | <b>1001</b> | <b>1001</b> |
| <b>1002</b> | 1002 | <b>1002</b> | <b>1002</b> |
| <b>1003</b> | 1003 | <b>1003</b> | <b>1003</b> |
| <b>1004</b> | 1004 | <b>1004</b> | <b>1004</b> |
| <b>1005</b> | 1005 | <b>1005</b> | <b>1005</b> |
| <b>1006</b> | 1006 | <b>1006</b> | <b>1006</b> |
| <b>1007</b> | 1007 | <b>1007</b> | <b>1007</b> |
| <b>1008</b> | 1008 | <b>1008</b> | <b>1008</b> |
| <b>1009</b> | 1009 | <b>1009</b> | <b>1009</b> |
| <b>1010</b> | 1010 | <b>1010</b> | <b>1010</b> |
| <b>1011</b> | 1011 | <b>1011</b> | <b>1011</b> |
| <b>1012</b> | 1012 | <b>1012</b> | <b>1012</b> |
| <b>1013</b> | 1013 | <b>1013</b> | <b>1013</b> |
| <b>1014</b> | 1014 | <b>1014</b> | <b>1014</b> |
| <b>1015</b> | 1015 | <b>1015</b> | <b>1015</b> |
| <b>1016</b> | 1016 | <b>1016</b> | <b>1016</b> |
| <b>1017</b> | 1017 | <b>1017</b> | <b>1017</b> |
| <b>1018</b> | 1018 | <b>1018</b> | <b>1018</b> |
| <b>1019</b> | 1019 | <b>1019</b> | <b>1019</b> |
| <b>1020</b> | 1020 | <b>1020</b> | <b>1020</b> |
| <b>1021</b> | 1021 | <b>1021</b> | <b>1021</b> |
| <b>1022</b> | 1022 | <b>1022</b> | <b>1022</b> |
| <b>1023</b> | 1023 | <b>1023</b> | <b>1023</b> |
| <b>1024</b> | 1024 | <b>1024</b> | <b>1024</b> |
| <b>1025</b> | 1025 | <b>1025</b> | <b>1025</b> |
| <b>1026</b> | 1026 | <b>1026</b> | <b>1026</b> |
| <b>1027</b> | 1027 | <b>1027</b> | <b>1027</b> |
| <b>1028</b> | 1028 | <b>1028</b> | <b>1028</b> |
| <b>1029</b> | 1029 | <b>1029</b> | <b>1029</b> |
| <b>1030</b> | 1030 | <b>1030</b> | <b>1030</b> |
| <b>1031</b> | 1031 | <b>1031</b> | <b>1031</b> |
| <b>1032</b> | 1032 | <b>1032</b> | <b>1032</b> |
| <b>1033</b> | 1033 | <b>1033</b> | <b>1033</b> |
| <b>1034</b> | 1034 | <b>1034</b> | <b>1034</b> |
| <b>1035</b> | 1035 | <b>1035</b> | <b>1035</b> |
| <b>1036</b> | 1036 | <b>1036</b> | <b>1036</b> |
| <b>1037</b> | 1037 | <b>1037</b> | <b>1037</b> |
| <b>1038</b> | 1038 | <b>1038</b> | <b>1038</b> |
| <b>1039</b> | 1039 | <b>1039</b> | <b>1039</b> |
| <b>1040</b> | 1040 | <b>1040</b> | <b>1040</b> |
| <b>1041</b> | 1041 | <b>1041</b> | <b>1041</b> |
| <b>1042</b> | 1042 | <b>1042</b> | <b>1042</b> |
| <b>1043</b> | 1043 | <b>1043</b> | <b>1043</b> |
| <b>1044</b> | 1044 | <b>1044</b> | <b>1044</b> |
| <b>1045</b> | 1045 | <b>1045</b> | <b>1045</b> |
| <b>1046</b> | 1046 | <b>1046</b> | <b>1046</b> |
| <b>1047</b> | 1047 | <b>1047</b> | <b>1047</b> |
| <b>1048</b> | 1048 | <b>1048</b> | <b>1048</b> |
| <b>1049</b> | 1049 | <b>1049</b> | <b>1049</b> |
| <b>1050</b> | 1050 | <b>1050</b> | <b>1050</b> |
| <b>1051</b> | 1051 | <b>1051</b> | <b>1051</b> |
| <b>1052</b> | 1052 | <b>1052</b> | <b>1052</b> |
| <b>1053</b> | 1053 | <b>1053</b> | <b>1053</b> |
| <b>1054</b> | 1054 | <b>1054</b> | <b>1054</b> |
| <b>1055</b> | 1055 | <b>1055</b> | <b>1055</b> |
| <b>1056</b> | 1056 | <b>1056</b> | <b>1056</b> |
| <b>1057</b> | 1057 | <b>1057</b> | <b>1057</b> |
| <b>1058</b> | 1058 | <b>1058</b> | <b>1058</b> |
| <b>1059</b> | 1059 | <b>1059</b> | <b>1059</b> |
| <b>1060</b> | 1060 | <b>1060</b> | <b>1060</b> |
| <b>1061</b> | 1061 | <b>1061</b> | <b>1061</b> |
| <b>1062</b> | 1062 | <b>1062</b> | <b>1062</b> |
| <b>1063</b> | 1063 | <b>1063</b> | <b>1063</b> |
| <b>1064</b> | 1064 | <b>1064</b> | <b>1064</b> |
| <b>1065</b> | 1065 | <b>1065</b> | <b>1065</b> |
| <b>1066</b> | 1066 | <b>1066</b> | <b>1066</b> |
| <b>1067</b> | 1067 | <b>1067</b> | <b>1067</b> |
| <b>1068</b> | 1068 | <b>1068</b> | <b>1068</b> |
| <b>1069</b> | 1069 | <b>1069</b> | <b>1069</b> |
| <b>1070</b> | 1070 | <b>1070</b> | <b>1070</b> |
| <b>1071</b> | 1071 | <b>1071</b> | <b>1071</b> |
| <b>1072</b> | 1072 | <b>1072</b> | <b>1072</b> |
| <b>1073</b> | 1073 | <b>1073</b> | <b>1073</b> |
| <b>1074</b> | 1074 | <b>1074</b> | <b>1074</b> |
| <b>1075</b> | 1075 | <b>1075</b> | <b>1075</b> |
| <b>1076</b> | 1076 | <b>1076</b> | <           |

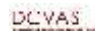

## 2. How?

### Methodology Advancements

#### Number of Criteria Rule

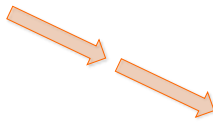

Weighted Criterion  
with Threshold Score

DCVAS

## 2. How?

### 1987 ACR Rheumatoid Arthritis Classification Criteria

Table 5. The 1987 revised criteria for the classification of rheumatoid arthritis (traditional format)\*

| Criteria                              | Definition                                                                                                                                                                                                                                                            |
|---------------------------------------|-----------------------------------------------------------------------------------------------------------------------------------------------------------------------------------------------------------------------------------------------------------------------|
| 1. Morning stiffness                  | Morning stiffness in and around the joints, lasting at least 1 hour before maximal improvement                                                                                                                                                                        |
| 2. Arthritis of 1 or more joint areas | Arthritis of 1 or more joint areas (swelling or fluid and bony enlargement) observed by a physician. The 14 possible areas are right or left PIP, MCP, wrist, elbow, knee, ankle, and MTP joints                                                                      |
| 3. Arthritis of hand joints           | At least 1 area swollen (as defined above) in a wrist, MCP, or PIP joint                                                                                                                                                                                              |
| 4. Symmetric arthritis                | Bilateral involvement of the same joint areas (as defined) in 1 or both sides of the body                                                                                                                                                                             |
| 5. Rheumatoid nodules                 | Subcutaneous involvement of PIPs, MCs, or MTPs in asymptomatic (without clinical symptoms) rheumatoid nodules, only bony prominences, or extensor tendons, or in subcutaneous regions, observed by a physician                                                        |
| 6. Serum rheumatoid factor            | Demonstration of abnormal amounts of serum rheumatoid factor by any method for which the result has been positive in >70% of normal control subjects                                                                                                                  |
| 7. Radiographic changes               | Radiographs (anterior-posterior of rheumatoid arthritis) at posteroanterior hand and wrist radiographs, which must include wrists or metacarpal base dislocations located in or near midline adjacent to the involved joint (metacarpal changes alone do not qualify) |

\* For classification purposes, a patient shall be said to have rheumatoid arthritis if 4 or more of these 7 criteria, Criteria 1 through 6 must have been present for at least 6 weeks. Patients with 1 clinical diagnosis are not included. Diagnosis in classic, definite, or probable rheumatoid arthritis is not to be made. See Table 1 for definitions of abbreviations.

DCVAS

## 2. How?

### 2010 ACR/EULAR Rheumatoid Arthritis Classification Criteria

| Criteria                                | Score |
|-----------------------------------------|-------|
| 1. Morning stiffness (11 items or more) | 1     |
| 2. Arthritis of 1 or more joint areas   | 1     |
| 3. Arthritis of hand joints             | 1     |
| 4. Symmetric arthritis                  | 1     |
| 5. Rheumatoid nodules                   | 1     |
| 6. Serum rheumatoid factor              | 1     |
| 7. Radiographic changes                 | 1     |
| 8. Erythrocyte sedimentation rate (ESR) | 1     |
| 9. C-reactive protein (CRP)             | 1     |
| 10. Hemoglobin (Hb)                     | 1     |
| 11. Hemoglobin (Hb)                     | 1     |
| 12. Hemoglobin (Hb)                     | 1     |
| 13. Hemoglobin (Hb)                     | 1     |
| 14. Hemoglobin (Hb)                     | 1     |
| 15. Hemoglobin (Hb)                     | 1     |
| 16. Hemoglobin (Hb)                     | 1     |
| 17. Hemoglobin (Hb)                     | 1     |
| 18. Hemoglobin (Hb)                     | 1     |
| 19. Hemoglobin (Hb)                     | 1     |
| 20. Hemoglobin (Hb)                     | 1     |
| 21. Hemoglobin (Hb)                     | 1     |
| 22. Hemoglobin (Hb)                     | 1     |
| 23. Hemoglobin (Hb)                     | 1     |
| 24. Hemoglobin (Hb)                     | 1     |
| 25. Hemoglobin (Hb)                     | 1     |
| 26. Hemoglobin (Hb)                     | 1     |
| 27. Hemoglobin (Hb)                     | 1     |
| 28. Hemoglobin (Hb)                     | 1     |
| 29. Hemoglobin (Hb)                     | 1     |
| 30. Hemoglobin (Hb)                     | 1     |
| 31. Hemoglobin (Hb)                     | 1     |
| 32. Hemoglobin (Hb)                     | 1     |
| 33. Hemoglobin (Hb)                     | 1     |
| 34. Hemoglobin (Hb)                     | 1     |
| 35. Hemoglobin (Hb)                     | 1     |
| 36. Hemoglobin (Hb)                     | 1     |
| 37. Hemoglobin (Hb)                     | 1     |
| 38. Hemoglobin (Hb)                     | 1     |
| 39. Hemoglobin (Hb)                     | 1     |
| 40. Hemoglobin (Hb)                     | 1     |
| 41. Hemoglobin (Hb)                     | 1     |
| 42. Hemoglobin (Hb)                     | 1     |
| 43. Hemoglobin (Hb)                     | 1     |
| 44. Hemoglobin (Hb)                     | 1     |
| 45. Hemoglobin (Hb)                     | 1     |
| 46. Hemoglobin (Hb)                     | 1     |
| 47. Hemoglobin (Hb)                     | 1     |
| 48. Hemoglobin (Hb)                     | 1     |
| 49. Hemoglobin (Hb)                     | 1     |
| 50. Hemoglobin (Hb)                     | 1     |
| 51. Hemoglobin (Hb)                     | 1     |
| 52. Hemoglobin (Hb)                     | 1     |
| 53. Hemoglobin (Hb)                     | 1     |
| 54. Hemoglobin (Hb)                     | 1     |
| 55. Hemoglobin (Hb)                     | 1     |
| 56. Hemoglobin (Hb)                     | 1     |
| 57. Hemoglobin (Hb)                     | 1     |
| 58. Hemoglobin (Hb)                     | 1     |
| 59. Hemoglobin (Hb)                     | 1     |
| 60. Hemoglobin (Hb)                     | 1     |
| 61. Hemoglobin (Hb)                     | 1     |
| 62. Hemoglobin (Hb)                     | 1     |
| 63. Hemoglobin (Hb)                     | 1     |
| 64. Hemoglobin (Hb)                     | 1     |
| 65. Hemoglobin (Hb)                     | 1     |
| 66. Hemoglobin (Hb)                     | 1     |
| 67. Hemoglobin (Hb)                     | 1     |
| 68. Hemoglobin (Hb)                     | 1     |
| 69. Hemoglobin (Hb)                     | 1     |
| 70. Hemoglobin (Hb)                     | 1     |
| 71. Hemoglobin (Hb)                     | 1     |
| 72. Hemoglobin (Hb)                     | 1     |
| 73. Hemoglobin (Hb)                     | 1     |
| 74. Hemoglobin (Hb)                     | 1     |
| 75. Hemoglobin (Hb)                     | 1     |
| 76. Hemoglobin (Hb)                     | 1     |
| 77. Hemoglobin (Hb)                     | 1     |
| 78. Hemoglobin (Hb)                     | 1     |
| 79. Hemoglobin (Hb)                     | 1     |
| 80. Hemoglobin (Hb)                     | 1     |
| 81. Hemoglobin (Hb)                     | 1     |
| 82. Hemoglobin (Hb)                     | 1     |
| 83. Hemoglobin (Hb)                     | 1     |
| 84. Hemoglobin (Hb)                     | 1     |
| 85. Hemoglobin (Hb)                     | 1     |
| 86. Hemoglobin (Hb)                     | 1     |
| 87. Hemoglobin (Hb)                     | 1     |
| 88. Hemoglobin (Hb)                     | 1     |
| 89. Hemoglobin (Hb)                     | 1     |
| 90. Hemoglobin (Hb)                     | 1     |
| 91. Hemoglobin (Hb)                     | 1     |
| 92. Hemoglobin (Hb)                     | 1     |
| 93. Hemoglobin (Hb)                     | 1     |
| 94. Hemoglobin (Hb)                     | 1     |
| 95. Hemoglobin (Hb)                     | 1     |
| 96. Hemoglobin (Hb)                     | 1     |
| 97. Hemoglobin (Hb)                     | 1     |
| 98. Hemoglobin (Hb)                     | 1     |
| 99. Hemoglobin (Hb)                     | 1     |
| 100. Hemoglobin (Hb)                    | 1     |

DCVAS

## 2. How?

### Establishing the Gold Standard

#### Submitting Physician Diagnosis

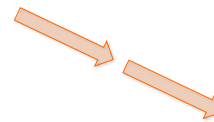

Expert Panel Review

DCVAS

## 2. How?

RESEARCH IN RHEUMATOLOGY  
Vol. 36, No. 10, October 2016  
DOI: 10.1093/rheumatology/kew016

#### SPECIAL ARTICLE

### 2016 American College of Rheumatology/European League Against Rheumatism Classification Criteria for Primary Sjögren's Syndrome

A Consensus and Data-Driven Methodology Involving Three International Patient Cohorts

Caroline H. Rasmussen,<sup>1</sup> Stephen C. Richman,<sup>1</sup> Raphaela Stern,<sup>2</sup> Lindsay A. Czirak,<sup>3</sup> Marc Lohmeyer,<sup>4</sup> Thomas M. Lipton,<sup>5</sup> Astrid Rasmussen,<sup>6</sup> Hui Szelebi,<sup>7</sup> Chantal Vissel,<sup>8</sup> Bruce J. Goldstein,<sup>9</sup> Xavier Mariette,<sup>10</sup> and the International Sjögren's Syndrome Criteria Working Group

DCVAS

## 2. How?

### DCVAS Classification criteria methodology: 3 phases

|                   |                                                                                                                                                                         |
|-------------------|-------------------------------------------------------------------------------------------------------------------------------------------------------------------------|
| 1. Case selection | <ul style="list-style-type: none"> <li>Clinical vignette expert panel review</li> <li>Avoid circularity of applying "gold standard"</li> <li>Quality control</li> </ul> |
| 2. Item selection | <ul style="list-style-type: none"> <li>Data-driven item reduction</li> <li>Clinical consensus item reduction</li> </ul>                                                 |
| 3. Final Criteria | <ul style="list-style-type: none"> <li>Combined data-driven and clinical expert review</li> <li>Model performance: face validity, discrimination</li> </ul>             |

DCVAS

2. How?

1. Case selection

Production of clinical vignettes

DCVAS

2. How?

1. Case selection

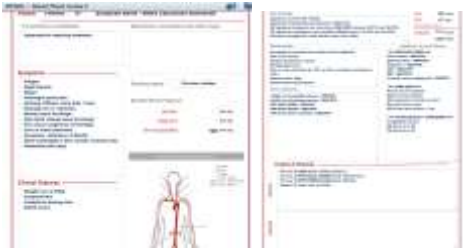

DCVAS

2. How?

1. Case selection

Production of clinical vignettes

Expert reviewers  
chosen from diverse  
geographical  
locations and  
specialties

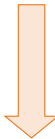

Web-based review system

DCVAS

2. How?

1. Case selection

Independent expert review of each clinical vignette

Expert reviewers were asked:

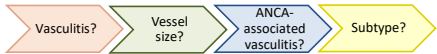

- Level of certainty: **very certain**, **moderately certain**, **uncertain**, or **very uncertain**
- **Match on subtype** ( $\geq$  moderate certainty) - Case passed
- **No match** - Second review by DCVAS committee member

DCVAS

2. How?

2. Item selection

Item selection: data-driven and expert consensus

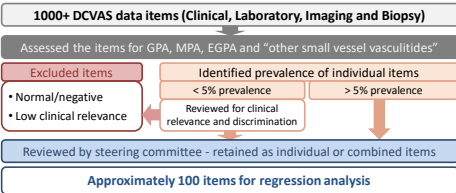

DCVAS

2. How?

3. Final criteria

Statistical methods

- Development (80%) and validation (20%) datasets
- Too many predictors for standard regression analysis, even after data reduction
- Specific type of analysis - Lasso logistic regression
- Multiple imputation for missing data

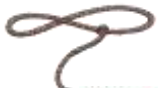

Menelaos Pavlou et al. *BMJ Research Methods and Reporting* 2015

DCVAS



Questions?

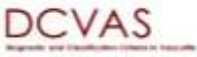

2017 Provisional Classification Criteria for Granulomatosis with Polyangiitis (GPA)

Presenter

Joanna Robson MBBS PhD MRCP  
Consultant Senior Lecturer in Rheumatology  
University of the West of England, Bristol

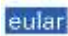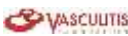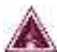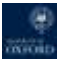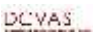

Results

DCVAS Classification criteria: 3 phases

1. Case selection

- Clinical vignette expert panel review
- Avoid circularity of applying "gold standard"
- Quality control

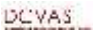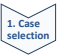

Expert reviewer characteristics

- Forty-nine reviewers from 22 countries

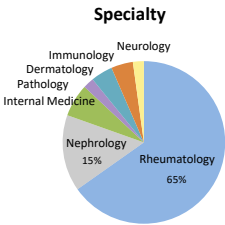

No. of AAV patients seen per year

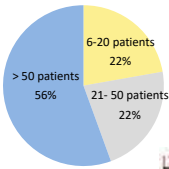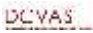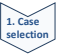

Expert reviewer process

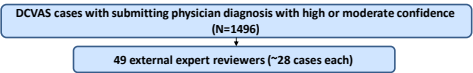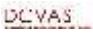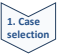

Expert reviewer process

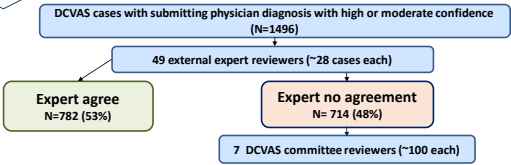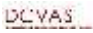

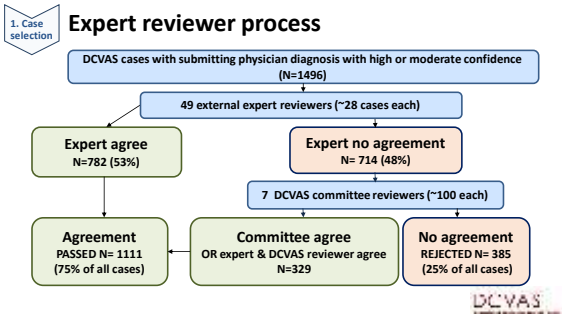

1. Case selection

### Expert review of cases

| Type of vasculitis                            | Submitting physician cases | Total cases passed on expert review |
|-----------------------------------------------|----------------------------|-------------------------------------|
| Granulomatosis with polyangiitis              | 578                        | 492                                 |
| Microscopic polyangiitis                      | 275                        | 205                                 |
| Eosinophilic granulomatosis with polyangiitis | 214                        | 156                                 |
| AAV-cannot subtype                            | 31                         | 20                                  |
| Anti-GBM                                      | 9                          | 10                                  |
| Cryoglobulinaemic vasculitis                  | 32                         | 24                                  |
| IgA vasculitis                                | 170                        | 108                                 |
| Other small vessel - cannot subtype           | 46                         | 1                                   |
| Polyarteritis nodosa                          | 22                         | 7                                   |
| Giant Cell Arteritis                          | 43                         | 38                                  |
| Takayasu arteritis                            | 39                         | 30                                  |
| Vasculitis mimics                             | 37                         | 20                                  |

DCVAS

1. Case selection

### Expert review of cases

Comparators for GPA

| Type of vasculitis                            | Submitting physician cases | Total cases passed on expert review |
|-----------------------------------------------|----------------------------|-------------------------------------|
| Granulomatosis with polyangiitis              | 578                        | 492                                 |
| Microscopic polyangiitis                      | 275                        | 205                                 |
| Eosinophilic granulomatosis with polyangiitis | 214                        | 156                                 |
| AAV-cannot subtype                            | 31                         | 20                                  |
| Anti-GBM                                      | 9                          | 10                                  |
| Cryoglobulinaemic vasculitis                  | 32                         | 24                                  |
| IgA vasculitis                                | 170                        | 108                                 |
| Other small vessel - cannot subtype           | 46                         | 1                                   |
| Polyarteritis nodosa                          | 22                         | 7                                   |
| Giant Cell Arteritis                          | 43                         | 38                                  |
| Takayasu arteritis                            | 39                         | 30                                  |
| Vasculitis mimics                             | 37                         | 20                                  |

DCVAS

## Results

### DCVAS Classification criteria: 3 phases

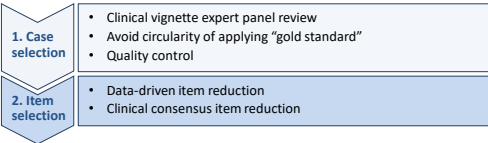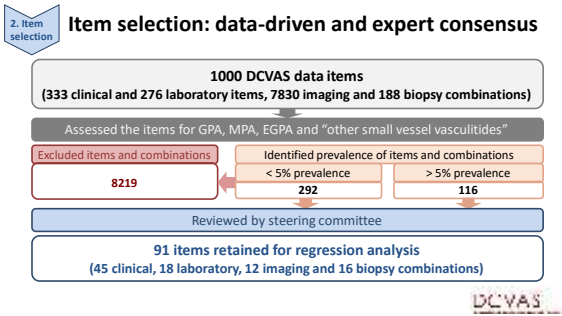

## Results

### DCVAS Classification criteria: 3 phases

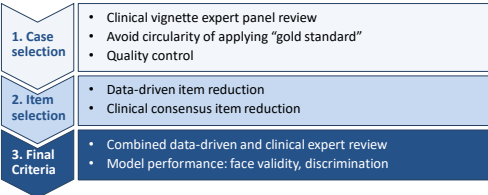

3. Final criteria

Patient characteristics for GPA analysis

|                            | GPA<br>n = 492 | Comparators<br>n = 531 | p-value |
|----------------------------|----------------|------------------------|---------|
| Age (SD)                   | 53.4 (16.4)    | 57.8 (16.9)            | <0.001  |
| Gender (F)                 | (47.2% of 492) | (49.5% of 531)         | 0.32    |
| Creatinine umol/L          | 159.3          | 203.0                  |         |
| mg/dL                      | 1.8            | 2.3                    | <0.001  |
| c-ANCA positive (%)        | 72.4%          | 5.5%                   | <0.01   |
| p-ANCA positive (%)        | 10.4%          | 47.3%                  | <0.01   |
| PR3- antibody positive (%) | 80.9%          | 3.4%                   | <0.01   |
| MPO- antibody positive (%) | 8.30%          | 53.9%                  | <0.01   |

DCVAS

3. Final criteria

Data split of development and validation sets (80% : 20%)

|             | Development set | Validation set |
|-------------|-----------------|----------------|
| GPA         | 395 (48.2%)     | 97 (47.5%)     |
| Comparators | 424 (51.8%)     | 107 (52.5%)    |
| Total       | 819             | 204            |

DCVAS

3. Final criteria

Results (all 22 independent variables)

| Rank | Description                                                 | OR (95% CI)        |
|------|-------------------------------------------------------------|--------------------|
| 1    | cANCA or PR3                                                | 59.3 (22.2, 158.4) |
| 2    | Bloody nasal discharge                                      | 18.1 (6.00, 54.6)  |
| 3    | Nasal ulcers, crusting or sino nasal congestion or blockage | 5.79 (2.28, 14.7)  |
| 4    | Eosinophil count $\geq 1 \times 10^9/L$                     | 0.05 (0.02, 0.17)  |
| 5    | Nasal polyps                                                | 0.03 (0.00, 0.23)  |
| 6    | Nodules/ mass or cavitation on chest imaging                | 7.44 (2.76, 20.0)  |
| 7    | Hearing loss or reduction                                   | 5.90 (1.96, 17.8)  |
| 8    | IgA deposition on biopsy                                    | 0.02 (0.00, 0.25)  |
| 9    | Granuloma on biopsy                                         | 5.48 (1.30, 23.1)  |
| 10   | pANCA or MPO                                                | 0.25 (0.10, 0.64)  |
| 11   | Red or painful eyes                                         | 3.87 (1.15, 13.0)  |

| Rank | Description                                                                        | OR (95% CI)       |
|------|------------------------------------------------------------------------------------|-------------------|
| 12   | Cartilagenous involvement                                                          | 3.96 (1.03, 15.3) |
| 13   | Abdominal pain                                                                     | 0.40 (0.13, 1.25) |
| 14   | Obstructive airways                                                                | 0.18 (0.06, 0.59) |
| 15   | Mononeuritis multiplex OR Motor neuropathy (not radiculopathy)                     | 0.30 (0.12, 0.78) |
| 16   | Anaemia (Hb <10g/dL)                                                               | 0.36 (0.16, 0.79) |
| 17   | Non-productive cough                                                               | 2.89 (1.12, 7.50) |
| 18   | Inflammation, consolidation or effusion of the nasal/ paranasal sinuses on imaging | 1.39 (0.47, 4.09) |
| 19   | Non blood stained nasal discharge                                                  | 2.01 (0.61, 6.67) |
| 20   | Fever, night sweats or rigors                                                      | 2.54 (1.16, 5.55) |
| 21   | Fibrosis or ILD on imaging of the chest                                            | 0.11 (0.02, 0.68) |
| 22   | Fatigue                                                                            | 0.54 (0.25, 1.17) |

DCVAS

3. Final criteria

Results (all 22 independent variables)

Data driven only top 5

| Rank | Description                                                 | OR (95% CI)        |
|------|-------------------------------------------------------------|--------------------|
| 1    | cANCA or PR3                                                | 59.3 (22.2, 158.4) |
| 2    | Bloody nasal discharge                                      | 18.1 (6.00, 54.6)  |
| 3    | Nasal ulcers, crusting or sino nasal congestion or blockage | 5.79 (2.28, 14.7)  |
| 4    | Eosinophil count $\geq 1 \times 10^9/L$                     | 0.05 (0.02, 0.17)  |
| 5    | Nasal polyps                                                | 0.03 (0.00, 0.23)  |
| 6    | Nodules/ mass or cavitation on chest imaging                | 7.44 (2.76, 20.0)  |
| 7    | Hearing loss or reduction                                   | 5.90 (1.96, 17.8)  |
| 8    | IgA deposition on biopsy                                    | 0.02 (0.00, 0.25)  |
| 9    | Granuloma on biopsy                                         | 5.48 (1.30, 23.1)  |
| 10   | pANCA or MPO                                                | 0.25 (0.10, 0.64)  |
| 11   | Red or painful eyes                                         | 3.87 (1.15, 13.0)  |

| Rank | Description                                                                        | OR (95% CI)       |
|------|------------------------------------------------------------------------------------|-------------------|
| 12   | Cartilagenous involvement                                                          | 3.96 (1.03, 15.3) |
| 13   | Abdominal pain                                                                     | 0.40 (0.13, 1.25) |
| 14   | Obstructive airways                                                                | 0.18 (0.06, 0.59) |
| 15   | Mononeuritis multiplex OR Motor neuropathy (not radiculopathy)                     | 0.30 (0.12, 0.78) |
| 16   | Anaemia (Hb <10g/dL)                                                               | 0.36 (0.16, 0.79) |
| 17   | Non-productive cough                                                               | 2.89 (1.12, 7.50) |
| 18   | Inflammation, consolidation or effusion of the nasal/ paranasal sinuses on imaging | 1.39 (0.47, 4.09) |
| 19   | Non blood stained nasal discharge                                                  | 2.01 (0.61, 6.67) |
| 20   | Fever, night sweats or rigors                                                      | 2.54 (1.16, 5.55) |
| 21   | Fibrosis or ILD on imaging of the chest                                            | 0.11 (0.02, 0.68) |
| 22   | Fatigue                                                                            | 0.54 (0.25, 1.17) |

DCVAS

3. Final criteria

Results (all 22 independent variables)

Data driven only top 5

| Rank | Description                                                 | OR (95% CI)        |
|------|-------------------------------------------------------------|--------------------|
| 1    | cANCA or PR3                                                | 59.3 (22.2, 158.4) |
| 2    | Bloody nasal discharge                                      | 18.1 (6.00, 54.6)  |
| 3    | Nasal ulcers, crusting or sino nasal congestion or blockage | 5.79 (2.28, 14.7)  |
| 4    | Eosinophil count $\geq 1 \times 10^9/L$                     | 0.05 (0.02, 0.17)  |
| 5    | Nasal polyps                                                | 0.03 (0.00, 0.23)  |
| 6    | Nodules/ mass or cavitation on chest imaging                | 7.44 (2.76, 20.0)  |
| 7    | Hearing loss or reduction                                   | 5.90 (1.96, 17.8)  |
| 8    | IgA deposition on biopsy                                    | 0.02 (0.00, 0.25)  |
| 9    | Granuloma on biopsy                                         | 5.48 (1.30, 23.1)  |
| 10   | pANCA or MPO                                                | 0.25 (0.10, 0.64)  |
| 11   | Red or painful eyes                                         | 3.87 (1.15, 13.0)  |

| Rank | Description                                                                        | OR (95% CI)       |
|------|------------------------------------------------------------------------------------|-------------------|
| 12   | Cartilagenous involvement                                                          | 3.96 (1.03, 15.3) |
| 13   | Abdominal pain                                                                     | 0.40 (0.13, 1.25) |
| 14   | Obstructive airways                                                                | 0.18 (0.06, 0.59) |
| 15   | Mononeuritis multiplex OR Motor neuropathy (not radiculopathy)                     | 0.30 (0.12, 0.78) |
| 16   | Anaemia (Hb <10g/dL)                                                               | 0.36 (0.16, 0.79) |
| 17   | Non-productive cough                                                               | 2.89 (1.12, 7.50) |
| 18   | Inflammation, consolidation or effusion of the nasal/ paranasal sinuses on imaging | 1.39 (0.47, 4.09) |
| 19   | Non blood stained nasal discharge                                                  | 2.01 (0.61, 6.67) |
| 20   | Fever, night sweats or rigors                                                      | 2.54 (1.16, 5.55) |
| 21   | Fibrosis or ILD on imaging of the chest                                            | 0.11 (0.02, 0.68) |
| 22   | Fatigue                                                                            | 0.54 (0.25, 1.17) |

DCVAS

3. Final criteria

Results (all 22 independent variables)

| Rank | Description                                                 | OR (95% CI)        |
|------|-------------------------------------------------------------|--------------------|
| 1    | cANCA or PR3                                                | 59.3 (22.2, 158.4) |
| 2    | Bloody nasal discharge                                      | 18.1 (6.00, 54.6)  |
| 3    | Nasal ulcers, crusting or sino nasal congestion or blockage | 5.79 (2.28, 14.7)  |
| 4    | Eosinophil count $\geq 1 \times 10^9/L$                     | 0.05 (0.02, 0.17)  |
| 5    | Nasal polyps                                                | 0.03 (0.00, 0.23)  |
| 6    | Nodules/ mass or cavitation on chest imaging                | 7.44 (2.76, 20.0)  |
| 7    | Hearing loss or reduction                                   | 5.90 (1.96, 17.8)  |
| 8    | IgA deposition on biopsy                                    | 0.02 (0.00, 0.25)  |
| 9    | Granuloma on biopsy                                         | 5.48 (1.30, 23.1)  |
| 10   | pANCA or MPO                                                | 0.25 (0.10, 0.64)  |
| 11   | Red or painful eyes                                         | 3.87 (1.15, 13.0)  |

| Rank | Description                                                                        | OR (95% CI)       |
|------|------------------------------------------------------------------------------------|-------------------|
| 12   | Cartilagenous involvement                                                          | 3.96 (1.03, 15.3) |
| 13   | Abdominal pain                                                                     | 0.40 (0.13, 1.25) |
| 14   | Obstructive airways                                                                | 0.18 (0.06, 0.59) |
| 15   | Mononeuritis multiplex OR Motor neuropathy (not radiculopathy)                     | 0.30 (0.12, 0.78) |
| 16   | Anaemia (Hb <10g/dL)                                                               | 0.36 (0.16, 0.79) |
| 17   | Non-productive cough                                                               | 2.89 (1.12, 7.50) |
| 18   | Inflammation, consolidation or effusion of the nasal/ paranasal sinuses on imaging | 1.39 (0.47, 4.09) |
| 19   | Non blood stained nasal discharge                                                  | 2.01 (0.61, 6.67) |
| 20   | Fever, night sweats or rigors                                                      | 2.54 (1.16, 5.55) |
| 21   | Fibrosis or ILD on imaging of the chest                                            | 0.11 (0.02, 0.68) |
| 22   | Fatigue                                                                            | 0.54 (0.25, 1.17) |

DCVAS

3. Final criteria

Results (all 22 independent variables)

Clinical and data driven

| Rank | Description                                                 | OR (95% CI)          |
|------|-------------------------------------------------------------|----------------------|
| 2    | Bloody nasal discharge                                      | 134.8 (10.05, 291.1) |
| 3    | Nasal ulcers, crusting or sino nasal congestion or blockage | 5.79 (2.28, 14.1)    |
| 4    | Eosinophil count $\geq 1 \times 10^9/L$                     | 0.08 (0.03, 0.17)    |
| 5    | Nasal polyps                                                | 0.03 (0.01, 0.23)    |
| 6    | Nodules/ mass or cavitation on chest imaging                | 7.44 (2.76, 20.0)    |
| 7    | Hearing loss or reduction                                   | 5.90 (1.96, 17.8)    |
| 8    | IgA deposition on biopsy                                    | 0.02 (0.00, 0.25)    |
| 9    | Granuloma on biopsy                                         | 5.48 (1.30, 23.1)    |
| 10   | pANCA or MPO                                                | 0.25 (0.10, 0.64)    |
| 11   | Red or painful eyes                                         | 3.87 (1.15, 13.0)    |

Clinical and data driven

| Rank | Description                                                                        | OR (95% CI)       |
|------|------------------------------------------------------------------------------------|-------------------|
| 12   | Cartilagenous involvement                                                          | 3.96 (1.03, 15.2) |
| 13   | Abdominal pain                                                                     | 0.40 (0.13, 1.25) |
| 14   | Obstructive airways                                                                | 0.18 (0.06, 0.59) |
| 15   | Mononeuritis multiplex OR Motor neuropathy (not radiculopathy)                     | 0.30 (0.12, 0.78) |
| 16   | Anaemia (Hb $<10g/dL$ )                                                            | 0.36 (0.16, 0.79) |
| 17   | Non-productive cough                                                               | 2.89 (1.12, 7.50) |
| 18   | Inflammation, consolidation or effusion of the nasal/ paranasal sinuses on imaging | 1.39 (0.47, 4.09) |
| 19   | Non blood stained nasal discharge                                                  | 2.01 (0.61, 6.67) |
| 20   | Fever, night sweats or rigors                                                      | 2.54 (1.16, 5.55) |
| 21   | Fibrosis or ILO on imaging of the chest                                            | 0.11 (0.02, 0.68) |
| 22   | Fatigue                                                                            | 0.54 (0.25, 1.17) |

DCVAS

3. Final criteria

Data-driven and clinically selected 9 item model

| Description                                                        | Odds Ratio (95%CI)  | P-value |
|--------------------------------------------------------------------|---------------------|---------|
| cANCA or PR3                                                       | 134.8 (62.4, 291.1) | <0.001  |
| Bloody nasal discharge/ ulcers/ crusting or sino-nasal congestion  | 16.0 (7.90, 32.2)   | <0.001  |
| Granuloma on biopsy                                                | 12.9 (3.76, 44.4)   | <0.001  |
| Nodules/ mass or cavitation on chest imaging                       | 5.77 (2.63, 12.7)   | <0.001  |
| Cartilagenous involvement*                                         | 5.50 (1.87, 16.2)   | <0.01   |
| Red or painful eyes                                                | 4.42 (1.67, 11.7)   | <0.01   |
| Hearing loss or reduction                                          | 3.74 (1.60, 8.73)   | <0.01   |
| Maximum eosinophil count ( $\times 10^9/L$ ) ( $\geq 1$ vs. $<1$ ) | 0.08 (0.03, 0.19)   | <0.001  |
| Nasal polyps                                                       | 0.02 (0.01, 0.10)   | <0.001  |

\*Inflamed ear or nose cartilage or hoarse voice/stridor, endobronchial involvement or saddle nose deformity

DCVAS

3. Final criteria

Points based risk score

| Risk factor at baseline                                             | Coefficient | Risk score |
|---------------------------------------------------------------------|-------------|------------|
| cANCA or PR3                                                        | 4.90        | + 5        |
| Bloody nasal discharge/ ulcers or crusting or sino-nasal congestion | 2.77        | + 3        |
| Granuloma on biopsy                                                 | 2.56        | + 3        |
| Nodules/ mass or cavitation on chest imaging                        | 1.75        | + 2        |
| Cartilagenous involvement                                           | 1.71        | + 2        |
| Red or painful eyes                                                 | 1.49        | + 1        |
| Hearing loss or reduction                                           | 1.32        | + 1        |
| Maximum eosinophil count $\geq 1$ ( $\times 10^9/L$ )               | - 2.56      | - 3        |
| Nasal polyps                                                        | - 3.70      | - 4        |

DCVAS

3. Final criteria

Model Performance

| Model Performance       | Development       | Validation        |
|-------------------------|-------------------|-------------------|
| AUC (95% CI)            | 0.98 (0.97, 0.99) | 0.98 (0.96, 0.99) |
| Cut-off $\geq 5$ points |                   |                   |
| Sensitivity             | 89.9%             | 90.7%             |
| Specificity             | 94.1%             | 93.5%             |
| Cut-off $\geq 6$ points |                   |                   |
| Sensitivity             | 78.2%             | 75.3%             |
| Specificity             | 98.4%             | 99.1%             |

DCVAS

3. Final criteria

Discrimination curves

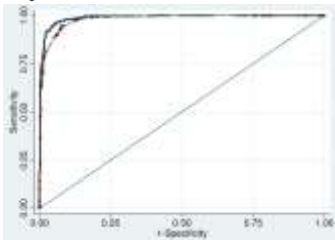

22 variables model (AUC 0.99)

9 variables model (AUC 0.98)

Risk Score (AUC 0.98)

DCVAS

ACR/ EULAR Provisional 2017 Classification Criteria for Granulomatosis with Polyangiitis (GPA)

This criteria set is for use when a diagnosis of small or medium vessel vasculitis has been made, in order to classify the patient as having GPA

|          |                                                                   |     |
|----------|-------------------------------------------------------------------|-----|
| Clinical | Bloody nasal discharge, ulcers, crusting or sino-nasal congestion | 3   |
|          | Nasal polyps                                                      | - 4 |
|          | Hearing loss or reduction                                         | 1   |
|          | Cartilagenous involvement                                         | 2   |
|          | Red or painful eyes                                               | 1   |
| Tests    | cANCA or PR3- antibody positive                                   | 5   |
|          | Eosinophil count $\geq 1$ ( $\times 10^9/L$ )                     | - 3 |
|          | Nodules, mass or cavitation on chest imaging                      | 2   |
|          | Granuloma on biopsy                                               | 3   |

Add scores for 9 items; a score of  $\geq 5$  is needed for classification of GPA

DCVAS

Acknowledgements

Expert panel reviewers

|                   |                           |                   |                   |
|-------------------|---------------------------|-------------------|-------------------|
| Alojzija Hocevar  | Eamonn Molloy             | Marco A Alba      | Pavel Novikov     |
| Aman Sharma       | Eric Matteson             | Maria Cid         | Robert Micheletti |
| Andrea Hinojosa   | Haner Direskeneli         | Mark Little       | Rona Smith        |
| Augusto Vaglio    | Jan Sznajd                | Nader Khalidi     | Ruth Gerald       |
| Bernhard Hellmich | Jason Springer            | Nataliya Milman   | Sergey Moiseev    |
| Bo Baslund        | Joerg Henes               | Neil Basu         | Shouichi Fujimoto |
| Carla Macieira    | Julia Holle               | Nevin Hammam      | Thomas Daikeler   |
| Carlo Salvarani   | Kazuo Matsui              | Nina Brown        | Thomas Hauser     |
| Carol Langford    | Lillian Barra             | Ömer Karadağ      | Thomas Neumann    |
| Cees Kallenberg   | Liza Rajasekhar           | Ora Gewurz-Singer | Vicky Quincey     |
| Charles Jennette  | Loic Guillevin            | Paul A Monach     | Vladimir Tesar    |
| Cord Sunderkötter | Luis Felipe Flores-Suárez | Paul Gatenby      | Wolfgang Schmidt  |
| David Jayne       |                           |                   |                   |

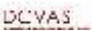

Acknowledgements

|                                                                                                                                                                                    |                                                                        |
|------------------------------------------------------------------------------------------------------------------------------------------------------------------------------------|------------------------------------------------------------------------|
| <b>Statisticians</b><br>Andrew Judge<br>Andrew Hutchings<br>Sara Khalid                                                                                                            | <b>Data management</b><br>Ann-Marie Morgan<br>David Gray<br>Issi Platt |
| <b>Clinical Research Fellows</b><br>Alberto Flores<br>Ana Rodrigues<br>Ben Seeliger<br>Hannah Querin<br>Jan Sznajd<br>Kasia Wawrzyszka-Adamczyk<br>Sara Monti<br>Takahiro Nunokawa | <b>Study Management</b><br>Anthea Craven                               |
|                                                                                                                                                                                    | <b>Site communications &amp; payments</b><br>Marian Montgomery         |
|                                                                                                                                                                                    | <b>Database design</b><br>Joe Barrett, Joe Rosa, Nathanael Gray        |

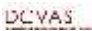

Questions?

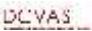



New ACR/EULAR Classification Criteria for ANCA-Associated Vasculitis: *Implications for Clinical Practice*

**Presenters**

Raashid Luqmani, University of Oxford  
Peter A. Merkel, University of Pennsylvania  
Richard Watts, University of East Anglia



ACR/ EULAR Provisional 2017 Classification Criteria for Granulomatosis with Polyangiitis (GPA)

This criteria set is for use when a diagnosis of small or medium vessel vasculitis has been made, in order to classify the patient as having GPA

|          |                                                                   |     |
|----------|-------------------------------------------------------------------|-----|
| Clinical | Bloody nasal discharge, ulcers, crusting or sino-nasal congestion | 3   |
|          | Nasal polyps                                                      | — 4 |
|          | Hearing loss or reduction                                         | 1   |
|          | Cartilagenous involvement                                         | 2   |
|          | Red or painful eyes                                               | 1   |
| Tests    | cANCA or PR3- antibody positive                                   | 5   |
|          | Eosinophil count ≥ 1 (x10 <sup>9</sup> /L)                        | — 3 |
|          | Nodules, mass or cavitation on chest imaging                      | 2   |
|          | Granuloma on biopsy                                               | 3   |

Add scores for 9 items; a score of ≥ 5 is needed for classification of GPA

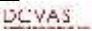

Key points

- Provide modern criteria for 21<sup>st</sup> century
- Clinically based
  - Reflects current investigative practice
  - Includes, BUT not critically dependent on
    - ANCA
    - Biopsy
  - Provide a risk score
  - Good specificity and sensitivity

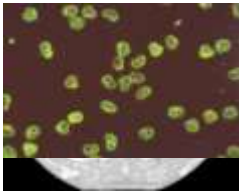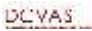

Clinical Implications

- Clinical trials based on modern classification criteria for ANCA-associated vasculitis
- Improvement in evidence base for decisions about therapy

DCVAS

Example Case 1

|                                                                     |   |
|---------------------------------------------------------------------|---|
| Bloody nasal discharge, ulcers or crusting or sino-nasal congestion | 3 |
| Nasal polyps                                                        | 4 |
| Hearing loss or reduction                                           | 1 |
| Cartilagenous involvement                                           | 2 |
| Red or painful eyes                                                 | 1 |
| cANCA or PR3- antibody positive                                     | 5 |
| Eosinophil count $\geq 1$ ( $\times 10^9/L$ )                       | 3 |
| Nodules, mass or cavitation on chest imaging                        | 2 |
| Granuloma on biopsy                                                 | 3 |

Risk score = 1; classified as *not* GPA  
(score of  $\geq 5$  is needed for classification of GPA)

DCVAS

Example Case 2

|                                                                     |   |
|---------------------------------------------------------------------|---|
| Bloody nasal discharge, ulcers or crusting or sino-nasal congestion | 3 |
| Nasal polyps                                                        | 4 |
| Hearing loss or reduction                                           | 1 |
| Cartilagenous involvement                                           | 2 |
| Red or painful eyes                                                 | 1 |
| cANCA or PR3- antibody positive                                     | 5 |
| Eosinophil count $\geq 1$ ( $\times 10^9/L$ )                       | 3 |
| Nodules, mass or cavitation on chest imaging                        | 2 |
| Granuloma on biopsy                                                 | 3 |

Risk score = 8; classified as GPA  
(score of  $\geq 5$  is needed for classification of GPA)

DCVAS

Example Case 1

- 45 year-old woman
- Constitutional symptoms
- Left foot and right wrist drop
- Interstitial lung disease

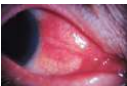

Scleritis

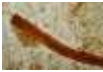

Red cell casts in urine

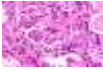

Pauci immune crescentic GN on renal biopsy

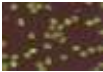

pANCA positive on IF  
MPO-ANCA positive by ELISA

DCVAS

Example Case 2

- 73 year-old woman
- Constitutional symptoms
- Cough
- Reduced hearing
- CRP 82 mg/L
- Eosinophil count normal

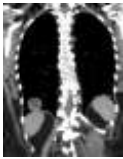

Normal CXR, but  
CT chest showing  
cavitating nodules

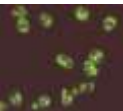

cANCA positive on IF  
PR3-ANCA strongly  
positive on ELISA

DCVAS

ACR-EULAR 2017 GPA criteria

Impact on the two cases

Case 1

- ACR 1990: Classified as PAN *and* GPA (WG)
- ACR/EULAR 2017: Risk score = 1; Not classified as GPA

Case 2

- ACR 1990: Not classified as GPA (WG)
- ACR/EULAR 2017: Risk score = 8; Classified as GPA

DCVAS

Future Analyses

- Develop criteria for AAV, PAN, TAK, GCA, and IgA
- Performance in different datasets
  - e.g.
    - physician-submitted cases
    - external datasets
- Comparison with previous ACR criteria
- Overall clinical features of each group and outcomes
- Diagnostic criteria



DCVAS: Recruitment by Diagnosis

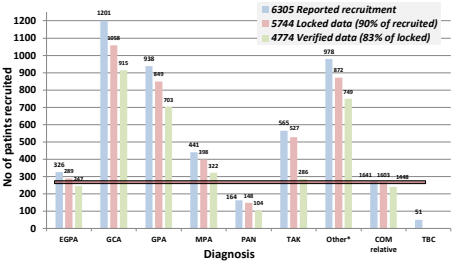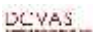

Questions?



Supplement: f1 [file 2421760.f1.pdf]
